# Supplementary material for: Integrated molecular and phytochemical characterization of Lemongrass (Cymbopogon sp.) germplasm from Vietnam and Laos
Source: Research Square preprint supplement (doi:10.21203/rs.3.rs-8418565/v1), 2026-01-01
Supplement: Supplementary file 1 [file 0ccc0bff2e0d4470ac5eedb2.docx]

Supplemental Table: List of RAPD primers used for screening polymorphisms in *Cymbopogon* germplasm

| No. | Primer | Sequence (5’-3’) | No. | Primer | Sequence (5’-3’) | No. | Primer | Sequence (5’-3’) | No. | Primer | Sequence (5’-3’) | No. | Primer | Sequence (5’-3’) | No. | Primer | Sequence (5’-3’) |
| --- | --- | --- | --- | --- | --- | --- | --- | --- | --- | --- | --- | --- | --- | --- | --- | --- | --- |
| 1 | UBC#301 | CGGTGGCGAA | 36 | UBC#336 | GCCACGGAGA | 71 | UBC#371 | TCTCGATTGC | 106 | UBC#406 | GCCACCTCCT | 141 | UBC#441 | CTGCGTTCTT | 176 | UBC#476 | TTGAGGCCCT |
| 2 | UBC#302 | CGGCCCACGT | 37 | UBC#337 | TCCCGAACCG | 72 | UBC#372 | CCCACTGACG | 107 | UBC#407 | TGGTCCTGGC | 142 | UBC#442 | CTACTCGGTT | 177 | UBC#477 | TGTTGTGCCC |
| 3 | UBC#303 | GCGGGAGACC | 38 | UBC#338 | CTGTGGCGGT | 73 | UBC#373 | CTGAGGAGTG | 108 | UBC#408 | CCGTCTCTTT | 143 | UBC#443 | TGATTGCTCG | 178 | UBC#478 | CGAGCTGGTC |
| 4 | UBC#304 | AGTCCTCGCC | 39 | UBC#339 | CTCACTTGGG | 74 | UBC#374 | GGTCAACCCT | 109 | UBC#409 | TAGGCGGCGG | 144 | UBC#444 | GCAGCCCCAT | 179 | UBC#479 | CTCATACGCG |
| 5 | UBC#305 | GCTGGTACCC | 40 | UBC#340 | GAGAGGCACC | 75 | UBC#375 | CCGGACACGA | 110 | UBC#410 | CGTCACAGAG | 145 | UBC#445 | TAGCAGCTTG | 180 | UBC#480 | GGAGGGGGGA |
| 6 | UBC#306 | GTCCTCGTAG | 41 | UBC#341 | CTGGGGCCGT | 76 | UBC#376 | CAGGACATCG | 111 | UBC#411 | GAGGCCCGTT | 146 | UBC#446 | GCCAGCGTTC | 181 | UBC#481 | GTAATTGCGC |
| 7 | UBC#307 | CGCATTTGCA | 42 | UBC#342 | GAGATCCCTC | 77 | UBC#377 | GACGGAAGAG | 112 | UBC#412 | TGCGCCGGTG | 147 | UBC#447 | CAGGCTCTAG | 182 | UBC#482 | CTATAGGCCG |
| 8 | UBC#308 | AGCGGCTAGG | 43 | UBC#343 | TGTTAGGCTC | 78 | UBC#378 | GACAACAGGA | 113 | UBC#413 | GAGGCGGCGA | 148 | UBC#448 | GTTGTGCCTG | 183 | UBC#483 | GCACTAAGAC |
| 9 | UBC#309 | ACATCCTGCG | 44 | UBC#344 | TGTTAGGCAC | 79 | UBC#379 | GGGCTAGGGT | 114 | UBC#414 | AAGGCACCAG | 149 | UBC#449 | GAGGTTCAAC | 184 | UBC#484 | CTGGCAAGGA |
| 10 | UBC#310 | GAGCCAGAAG | 45 | UBC#345 | GCGTGACCCG | 80 | UBC#380 | AGGAGTGAGA | 115 | UBC#415 | GTTCCAGCAG | 150 | UBC#450 | CGGAGAGCCC | 185 | UBC#485 | AGAATAGGGC |
| 11 | UBC#311 | GGTAACCGTA | 46 | UBC#346 | TAGGCGAACG | 81 | UBC#381 | ATGAGTCCTG | 116 | UBC#416 | GTGTTTCCGG | 151 | UBC#451 | CTAATCTCGC | 186 | UBC#486 | CCAGCATCAG |
| 12 | UBC#312 | ACGGCGTCAC | 47 | UBC#347 | TTGCTTGGCG | 82 | UBC#382 | ATACACCAGC | 117 | UBC#417 | GACAGGCCAA | 152 | UBC#452 | CTAATCACGG | 187 | UBC#487 | GTGGCTAGGT |
| 13 | UBC#313 | ACGGCAGTGG | 48 | UBC#348 | CACGGCTGCG | 83 | UBC#383 | GAGGCGCTGC | 118 | UBC#418 | GAGGAAGCTT | 153 | UBC#453 | AGTACAAGGG | 188 | UBC#488 | TTCGCTTCTC |
| 14 | UBC#314 | ACTTCCTCCA | 49 | UBC#349 | GGAGCCCCCT | 84 | UBC#384 | TGCGCCGCTA | 119 | UBC#419 | TACGTGCCCG | 154 | UBC#454 | GCTTACGGCA | 189 | UBC#489 | CGCACGCACA |
| 15 | UBC#315 | GGTCTCCTAG | 50 | UBC#350 | TGACGCGCTC | 85 | UBC#385 | ACCGGGAACG | 120 | UBC#420 | GCAGGGTTCG | 155 | UBC#455 | AGCAAGCCGG | 190 | UBC#490 | AGTCGACCTT |
| 16 | UBC#316 | CCTCACCTGT | 51 | UBC#351 | CTCCCGGTGG | 86 | UBC#386 | TGTAAGCTCG | 121 | UBC#421 | ACGGCCCACC | 156 | UBC#456 | GCGGAGGTCC | 191 | UBC#491 | TCCTGTCAAG |
| 17 | UBC#317 | CTAGGGGCTG | 52 | UBC#352 | CACAACGGGT | 87 | UBC#387 | CGCTGTCGCC | 122 | UBC#422 | CACCTGCGGG | 157 | UBC#457 | CGACGCCCTG | 192 | UBC#492 | GTGACTGCTC |
| 18 | UBC#318 | CGGAGAGCGA | 53 | UBC#353 | TGGGCTCGCT | 88 | UBC#388 | CGGTCGCGTC | 123 | UBC#423 | GGGTCTCGAA | 158 | UBC#458 | CTCACATGCC | 193 | UBC#493 | CCGAATCACT |
| 19 | UBC#319 | GTGGCCGCGC | 54 | UBC#354 | CTAGAGGCCG | 89 | UBC#389 | CGCCCGCAGT | 124 | UBC#424 | ACGGAGGTTC | 159 | UBC#459 | GCGTCGAGGG | 194 | UBC#494 | TGATGCTGTC |
| 20 | UBC#320 | CCGGCATAGA | 55 | UBC#355 | GTATGGGGCT | 90 | UBC#390 | TCACTCAGAG | 125 | UBC#425 | CGTCGGGCCT | 160 | UBC#460 | ACTGACCGGC | 195 | UBC#495 | CTTTCCTTCC |
| 21 | UBC#321 | ATCTAGGGAC | 56 | UBC#356 | GCGGCCCTCT | 91 | UBC#391 | GCGAACCTCG | 126 | UBC#426 | TCTCCCGGTG | 161 | UBC#461 | CCCGTATGTC | 196 | UBC#496 | CCTTTCAAGG |
| 22 | UBC#322 | GCCGCTACTA | 57 | UBC#357 | AGGCCAAATG | 92 | UBC#392 | CCTGGTGGTT | 127 | UBC#427 | GTAATCGACG | 162 | UBC#462 | CATAGCGGCA | 197 | UBC#497 | GCATAGTGCG |
| 23 | UBC#323 | GACATCTCGC | 58 | UBC#358 | GGTCAGGCCC | 93 | UBC#393 | TTCCATGCCT | 128 | UBC#428 | GGCTGCGGTA | 163 | UBC#463 | AGGCGGAAGC | 198 | UBC#498 | GACAGTCCTG |
| 24 | UBC#324 | ACAGGGAACG | 59 | UBC#359 | AGGCAGACCT | 94 | UBC#394 | TCACGCAGTT | 129 | UBC#429 | AAACCTGGAC | 164 | UBC#464 | CACAAGCCTG | 199 | UBC#499 | GGCCGATGAT |
| 25 | UBC#325 | TCTAAGCTCG | 60 | UBC#360 | CTCTCCAGGC | 95 | UBC#395 | TCACTTGAGG | 130 | UBC#430 | AGTCGGCACC | 165 | UBC#465 | GGTCAGGGCT | 200 | UBC#500 | TTGCGTCATG |
| 26 | UBC#326 | CGGATCTCTA | 61 | UBC#361 | GCGAGGTGCT | 96 | UBC#396 | GAATGCGAGG | 131 | UBC#431 | CTGCGGGTCA | 166 | UBC#466 | TTCTTAGCGG |  |  |  |
| 27 | UBC#327 | ATACGGCGTC | 62 | UBC#362 | CCGCCTTACA | 97 | UBC#397 | GGGCTGTGCC | 132 | UBC#432 | AGCGTCGACT | 167 | UBC#467 | AGCACGGGCA |  |  |  |
| 28 | UBC#328 | ATGGCCTTAC | 63 | UBC#363 | ATGACGTTGA | 98 | UBC#398 | CAGTGCTCTT | 133 | UBC#433 | TCACGTGCCT | 168 | UBC#468 | ACGGAAGCGC |  |  |  |
| 29 | UBC#329 | GCGAACCTCC | 64 | UBC#364 | GGCTCTCGCG | 99 | UBC#399 | TTGCTGGGCG | 134 | UBC#434 | TCGCTAGTCC | 169 | UBC#469 | CTCCAGCAAA |  |  |  |
| 30 | UBC#330 | GGTGGTTTCC | 65 | UBC#365 | TAGACAGAGG | 100 | UBC#400 | GCCCTGATAT | 135 | UBC#435 | CTAGTAGGGG | 170 | UBC#470 | AGGAGCTGGG |  |  |  |
| 31 | UBC#331 | GCCTAGTCAC | 66 | UBC#366 | CCTGATTGCC | 101 | UBC#401 | TAGGACAGTC | 136 | UBC#436 | GAGGGGGCCA | 171 | UBC#471 | CCGACCGGAA |  |  |  |
| 32 | UBC#332 | AACGCGTAGA | 67 | UBC#367 | ACCTTTGGCT | 102 | UBC#402 | CCCGCCGTTG | 137 | UBC#437 | AGTCCGCTGC | 172 | UBC#472 | AGGCGTGCAA |  |  |  |
| 33 | UBC#333 | GAATGCGACG | 68 | UBC#368 | ACTTGTGCGG | 103 | UBC#403 | GGAAGGCTGT | 138 | UBC#438 | AGACGGCCGG | 173 | UBC#473 | ATCCCCAAGA |  |  |  |
| 34 | UBC#334 | ATGGCAAAGC | 69 | UBC#369 | GCGCATAGCA | 104 | UBC#404 | TCTCTACGAC | 139 | UBC#439 | GCCCCTTGAC | 174 | UBC#474 | AGGCGGGAAC |  |  |  |
| 35 | UBC#335 | TGGACCACCC | 70 | UBC#370 | TCAGCCAGCG | 105 | UBC#405 | CTCTCGTGCG | 140 | UBC#440 | CTGTCGAACC | 175 | UBC#475 | CCAGCGTATT |  |  |  |
